# Supplementary material
Source: publisher figshare collection journal article supplement (https://acs.figshare.com/ndownloader/files/8890360)
Supplement: Supplementary file 1 [file 8890360]

**SUPPORTING INFORMATION**

# Reactive oxidative species and speciated particulate light-duty engine emissions from diesel and biodiesel fuel blends

Britt A. Holmén\*, Benjamin Rukavina, John Kasumba<sup>&</sup> and Naomi K. Fukagawa<sup>#</sup>

The University of Vermont, 213D Votey Building, 33 Colchester Ave, Burlington, VT 05401

<sup>#</sup> New affiliation: USDA Beltsville Human Nutrition Research Center, Beltsville, MD 20705

<sup>&</sup> New affiliation: Chemistry Department, Western Kentucky University, Bowling Green, KY 42101

\* Corresponding Author Email: bholmen@uvm.edu

**CONTENTS**

|                                                                                    |           |
|------------------------------------------------------------------------------------|-----------|
| <b>I. Fuel Properties &amp; Specifications, Fuel Composition and Driving Cycle</b> | <b>2</b>  |
| <b>II. Detailed Results from DTT Assay</b>                                         | <b>7</b>  |
| <b>III. Extraction of Organic Chemical Compounds</b>                               | <b>7</b>  |
| <b>IV. Determination of Organic Compound Detection Limits</b>                      | <b>9</b>  |
| <b>V. Emission Rates of Polar Organic Compounds by Functional Group by Blend</b>   | <b>10</b> |
| <b>VI. Elemental Data from ICP-MS Analysis of Diluted PM Filters</b>               | <b>15</b> |
| <b>VII. References Cited</b>                                                       | <b>16</b> |

## I. Fuel Properties & Specifications, Fuel Composition and Driving Cycle

**Table S-1. Measured properties of the neat soybean and waste vegetable oil biodiesel fuels, and Trono ULSD fuel.**

| Property             | Units               | Soybean | WVO               | Trono Fuel <sup>a</sup><br>(ULSD)<br>Batch1/Batch2 | ASTM D6751<br>Biodiesel (B100) |       | ASTM D975 <sup>b</sup><br>Petrodiesel |       |
|----------------------|---------------------|---------|-------------------|----------------------------------------------------|--------------------------------|-------|---------------------------------------|-------|
|                      |                     |         |                   |                                                    | Min                            | Max   | Min                                   | Max   |
| Density              | kg/m <sup>3</sup>   | 0.876   | 0.876             | 0.809/0.812                                        |                                |       |                                       |       |
| Flash point          | °C                  | 167.4   | 176.5             | 45.6/ND                                            | 130                            |       | 52                                    |       |
| Kinematic viscosity  | mm <sup>2</sup> /s  | 4.166   | 4.354             |                                                    | 1.9                            | 6.0   | 1.9                                   | 4.1   |
| Cloud point          | °C                  | 1.13    | -0.15             |                                                    | Report                         |       |                                       |       |
| Sulfur content       | ppm                 | <1      | 2.5               | 1.2/ND                                             |                                | 15    |                                       | 10    |
| Carbon residue       | wt, %               | 0.033   | 0.05              | 0.003/ND                                           |                                | 0.05  |                                       | 0.35  |
| Cetane number        |                     | 49.9    |                   | 46.7/ND                                            | 47                             |       |                                       | 40    |
| Oxidative stability  | h                   | 6.28    | 11.49             |                                                    | 3                              |       |                                       |       |
| Ash content          | wt, %               | <0.005  | -                 |                                                    |                                | 0.02  |                                       | 0.01  |
| Cold soak filtration | Sec                 | 86      | 2058 <sup>c</sup> |                                                    |                                | 360   |                                       |       |
| Water content        | mg/kg               | 0.01    | 0.00              | 0.000/ND                                           |                                | 500   |                                       | 500   |
| Acid value           | mg KOH/g            | 0.134   | 0.196             |                                                    |                                | 0.5   |                                       |       |
| Copper corrosion     | Degree of corrosion |         |                   | 1A/ND                                              |                                |       |                                       | No.3A |
| Phosphorus           | wt, %               | <0.001  | <0.001            |                                                    |                                | 0.001 |                                       |       |
| Sodium and Potassium | ppm                 | <0.5    | 30.1 <sup>c</sup> |                                                    |                                | 5     |                                       |       |
| Free glycerol        | wt, %               | 0.007   | 0.003             |                                                    |                                | 0.02  |                                       |       |
| Total glycerol       | wt, %               | 0.050   | 0.049             |                                                    |                                | 0.24  |                                       |       |

<sup>a</sup> The two density values correspond to the densities obtained for the two Trono fuel batches. Batch1 was used to prepare the WVO biodiesel blends and Batch2 was used to prepare the soybean biodiesel blends.

<sup>b</sup> No. 2 diesel fuel. <sup>c</sup> Value exceeded ASTM standard.

Fuel testing was performed at the University of Connecticut's Biofuels Laboratory, Storrs, CT. ND means that No Data was available for that test. Both biodiesel fuels (B100) had antioxidant Naugalube 403 (Chemtura Corporation, Middlebury CT; N,N'-di-sec-butyl-p-phenylenediamine) added at 2000ppm.

**Table S-2. Concentrations ( $\mu\text{g}/\text{gal}_{\text{fuel}}$ ) of n-alkanes measured in the WVO and soybean biodiesel fuel blends. SD means one standard deviation. n = 2. No n-alkanes were detected in the neat biodiesel fuels.**

| <b>WVO</b>              |              |             |              |             |              |             |              |             |
|-------------------------|--------------|-------------|--------------|-------------|--------------|-------------|--------------|-------------|
| <b>Compound</b>         | <b>B00</b>   | <b>SD</b>   | <b>B10</b>   | <b>SD</b>   | <b>B20</b>   | <b>SD</b>   | <b>B50</b>   | <b>SD</b>   |
| n-Undecane <sup>a</sup> |              |             |              |             |              |             |              |             |
| n-Dodecane              | 5.77         | 0.17        | 5.17         | 0.75        | 4.67         | 0.08        | 2.89         | 0.15        |
| n-Tridecane             | 5.54         | 0.04        | 4.95         | 0.68        | 4.49         | 0.24        | 2.70         | 0.00        |
| n-Tetradecane           | 4.33         | 0.03        | 3.89         | 0.34        | 3.46         | 0.06        | 2.26         | 0.08        |
| n-Pentadecane           | 3.98         | 0.03        | 3.55         | 0.35        | 3.25         | 0.25        | 2.10         | 0.08        |
| n-Hexadecane            | 3.28         | 0.04        | 2.84         | 0.27        | 2.70         | 0.17        | 1.62         | 0.06        |
| n-Heptadecane           | 3.86         | 0.18        | 3.31         | 0.33        | 3.17         | 0.29        | 1.96         | 0.12        |
| n-Octadecane            | 3.52         | 0.04        | 3.09         | 0.31        | 2.94         | 0.04        | 2.16         | 0.09        |
| n-Nonadecane            | 2.47         | 0.02        | 2.20         | 0.28        | 2.08         | 0.01        | 1.64         | 0.08        |
| n-Eicosane              | 1.91         | 0.00        | 1.75         | 0.13        | 1.70         | 0.02        | 1.35         | 0.04        |
| n-Heneicosane           | 1.42         | 0.02        | 1.34         | 0.09        | 1.28         | 0.06        | 1.14         | 0.01        |
| n-Docosane              | 1.10         | 0.01        | 1.06         | 0.04        | 1.07         | 0.00        | 0.96         | 0.01        |
| n-Tricosane             | 0.79         | 0.01        | 0.78         | 0.02        | 0.77         | 0.00        | 0.72         | 0.00        |
| n-Tetracosane           | 0.63         | 0.01        | 0.62         | 0.01        | 0.61         | 0.01        | 0.59         | 0.00        |
| <b>Total</b>            | <b>38.59</b> | <b>0.26</b> | <b>34.55</b> | <b>1.28</b> | <b>32.19</b> | <b>0.50</b> | <b>22.09</b> | <b>0.26</b> |
| <b>Soybean</b>          |              |             |              |             |              |             |              |             |
| <b>Compounds</b>        | <b>B00</b>   | <b>SD</b>   | <b>B10</b>   | <b>SD</b>   | <b>B20</b>   | <b>SD</b>   | <b>B50</b>   | <b>SD</b>   |
| n-Undecane <sup>a</sup> |              |             |              |             |              |             |              |             |
| n-Dodecane              | 5.48         | 0.26        | 5.12         | 0.19        | 5.02         | 0.17        | 2.94         | 0.14        |
| n-Tridecane             | 5.57         | 0.06        | 5.18         | 0.21        | 5.08         | 0.09        | 2.90         | 0.17        |
| n-Tetradecane           | 4.21         | 0.03        | 4.11         | 0.09        | 3.98         | 0.03        | 2.36         | 0.16        |
| n-Pentadecane           | 4.01         | 0.02        | 3.85         | 0.07        | 3.62         | 0.02        | 2.34         | 0.01        |
| n-Hexadecane            | 3.50         | 0.02        | 3.37         | 0.07        | 3.34         | 0.02        | 1.83         | 0.11        |
| n-Heptadecane           | 4.26         | 0.06        | 4.07         | 0.13        | 4.07         | 0.08        | 2.25         | 0.03        |
| n-Octadecane            | 3.96         | 0.16        | 3.76         | 0.07        | 3.42         | 0.08        | 2.42         | 0.10        |
| n-Nonadecane            | 2.74         | 0.04        | 2.65         | 0.04        | 2.31         | 0.11        | 1.79         | 0.04        |
| n-Eicosane              | 1.99         | 0.10        | 1.92         | 0.03        | 1.62         | 0.01        | 1.40         | 0.04        |
| n-Heneicosane           | 1.36         | 0.02        | 1.35         | 0.01        | 1.08         | 0.01        | 1.08         | 0.00        |
| n-Docosane              | 1.05         | 0.01        | 1.05         | 0.00        | 0.79         | 0.01        | 0.95         | 0.00        |
| n-Tricosane             | 0.77         | 0.01        | 0.78         | 0.01        | 0.56         | 0.00        | 0.71         | 0.01        |
| n-Tetracosane           | 0.60         | 0.00        | 0.61         | 0.01        | 0.43         | 0.00        | 0.59         | 0.00        |
| <b>Total</b>            | <b>39.51</b> | <b>0.34</b> | <b>37.82</b> | <b>0.35</b> | <b>35.33</b> | <b>0.25</b> | <b>23.57</b> | <b>0.32</b> |

<sup>a</sup> means that the compound was detected but not quantitated

**Table S-3. FAMES concentrations (g/gal<sub>fuel</sub>) of the different blends of WVO and soybean biodiesel fuel blends. SD means one standard deviation, and ND means the compound was not detected. For WVO, n = 2; For Soybean, n = 4. No FAMES were detected in the petrodiesel fuel.**

| <b>WVO</b>                      |             |             |              |             |               |              |               |              |
|---------------------------------|-------------|-------------|--------------|-------------|---------------|--------------|---------------|--------------|
| <b>Compound</b>                 | <b>B10</b>  | <b>SD</b>   | <b>B20</b>   | <b>SD</b>   | <b>B50</b>    | <b>SD</b>    | <b>B100</b>   | <b>SD</b>    |
| Methyl Myristate (C14:0)        | 1.6         | 0           | 1.9          | 0.0         | 2.9           | 0.0          | 4.7           | 0.0          |
| Methyl Palmitate (C16:0)        | 14.7        | 4.2         | 49.1         | 4.0         | 183.2         | 33.7         | 323.2         | 30.0         |
| Methyl Linolenate (C18:3n3c)    | 5.7         | 0.2         | 18.6         | 2.4         | 85.9          | 17.9         | 153.0         | 20.2         |
| Methyl Linolelaidate (C18:2n6t) | ND          | ND          | ND           | ND          | ND            | ND           | ND            | ND           |
| Methyl Linoleate (C18:2n6c)     | 38.2        | 11.9        | 138.8        | 13.7        | 545.6         | 106.2        | 959.0         | 99.5         |
| Methyl Elaidate (C18:1n9t)      | ND          | ND          | ND           | ND          | ND            | ND           | ND            | ND           |
| Methyl Oleate (C18:1n9c)        | 18.5        | 4.6         | 65.5         | 4.6         | 269.8         | 44.4         | 461.2         | 47.9         |
| Methyl Stearate (C18:0)         | 3.9         | 0.7         | 10.8         | 1.1         | 49.1          | 9.7          | 83.3          | 5.2          |
| Methyl Arachidate (C20:0)       | 0.3         | 0.0         | 0.8          | 0.2         | 2.1           | 0.2          | 5.0           | 0.5          |
| Methyl Behenate (C22:0)         | 1.4         | 0.2         | 2.0          | 0.2         | 4.2           | 0.5          | 7.3           | 0.9          |
| <b>Total (g/Gal Fuel)</b>       | <b>84.2</b> | <b>13.5</b> | <b>287.3</b> | <b>15.2</b> | <b>1142.8</b> | <b>121.7</b> | <b>1996.6</b> | <b>116.3</b> |
| <b>Soybean</b>                  |             |             |              |             |               |              |               |              |
| <b>Compound</b>                 |             |             | <b>B20</b>   | <b>SD</b>   |               |              | <b>B100</b>   | <b>SD</b>    |
| Methyl Myristate (C14:0)        |             |             | 3.6          | 0.0         |               |              | 4.9           | 0.6          |
| Methyl Palmitate (C16:0)        |             |             | 79.7         | 10.3        |               |              | 517.3         | 19.0         |
| Methyl Linolenate (C18:3n3c)    |             |             | 36.2         | 7.2         |               |              | 312.3         | 16.6         |
| Methyl Linolelaidate (C18:2n6t) |             |             | ND           | ND          |               |              | ND            | ND           |
| Methyl Linoleate (C18:2n6c)     |             |             | 286.1        | 33.6        |               |              | 1833.3        | 65.1         |
| Methyl Elaidate (C18:1n9t)      |             |             | ND           | ND          |               |              | ND            | ND           |
| Methyl Oleate (C18:1n9c)        |             |             | 94.2         | 17.3        |               |              | 671.6         | 32.2         |
| Methyl Stearate (C18:0)         |             |             | 19.8         | 2.8         |               |              | 152.2         | 9.6          |
| Methyl Arachidate (C20:0)       |             |             | 1.0          | 0.3         |               |              | 7.8           | 0.4          |
| Methyl Behenate (C22:0)         |             |             | 3.3          | 0.3         |               |              | 11.0          | 0.4          |
| <b>Total</b>                    |             |             | <b>523.9</b> | <b>39.9</b> |               |              | <b>3510.3</b> | <b>77.5</b>  |

ND means that the compound was not detected.

**Table S-4. Aromatic hydrocarbons detected in diesel fuel. These compounds were not quantified.**

| <b>Compound</b>                         | <b>Compound</b>                                                 |
|-----------------------------------------|-----------------------------------------------------------------|
| Benzene, 1-methyl-4-(1-methylethyl)     | Benzene, 1,3-bis(1-methylethyl)                                 |
| Benzene, 1,2,3,5-tetramethyl            | 1H-Indene, 2,3-dihydro-4,7-dimethyl                             |
| Benzene, 1-ethyl-2,5-dimethyl           | 2H-1-Benzopyran-2-one, 3-methyl                                 |
| Naphthalene, 1,2,3,4-tetrahydro         | 1(3H)-Isobenzofuranone, 3-propylidene                           |
| Isopropyl phenyl ketone                 | Naphthalene, 2-chloro                                           |
| Benzene, pentamethyl                    | N-Nitrosodiphenylamine                                          |
| Benzene, 1-ethyl-3-(1-methylethyl)      | 1(3H)-Isobenzofuranone, 3-butylidene                            |
| Benzene, 1-(1,1-dimethylethyl)-3-methyl | Naphthalene, 1,6,7-trimethyl                                    |
| 2(1H)naphtholenone, 3,4-dihydro         | 1H-Imidazole, 4,5-dihydro-2-(1,2,3,4-tetrahydro-1-naphthalenyl) |

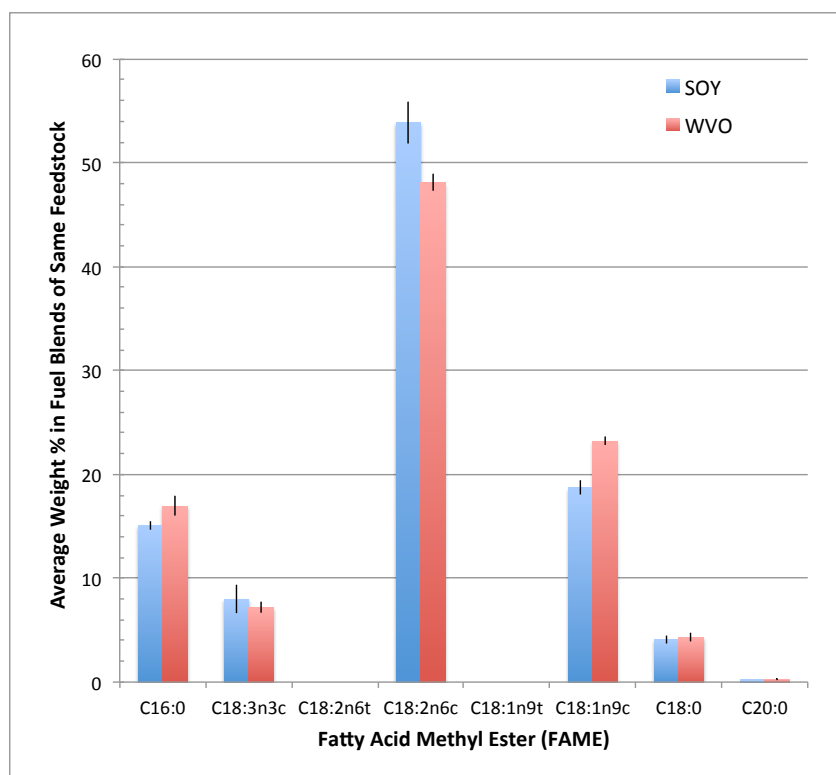

**Figure S1.** Average (and one standard deviation error bars) FAMES composition of the WVO and SOY sequence biodiesel blends based on GCMS analysis of diluted fuel. For WVO, results are based on analyses of B10, B20, B50 and B100. For SOY sequence, only B20 and B100 fuels were analyzed.

**Table S-5. CM-12 Engine, dynamometer, and lube oil specifications.**

| Engine                                          |                           |
|-------------------------------------------------|---------------------------|
| Bore of cylinder                                | 79.5 mm                   |
| Number of cylinders                             | 4                         |
| Stroke volume                                   | 474 cm <sup>3</sup>       |
| Rated speed                                     | 95.5 mm                   |
| Rated power                                     | 60 kW                     |
| Maximum torque                                  | 130 Nm at 2000 - 2400 RPM |
| Compression ratio                               | 19.5:1                    |
| Power Absorption Unit/ Eddy Current Dynamometer |                           |
| Manufacturer                                    | Zelu/ Klam                |
| Model Number                                    | K-40 PAU                  |
| Max Power                                       | 60kW                      |
| Max Torque                                      | 145Nm                     |
| Lubrication Oil                                 |                           |
| Manufacturer                                    | Castrol                   |
| Model Number                                    | SAE 5W-40                 |
| Part Number                                     | 06249                     |
| Type                                            | Synthetic                 |

**Drive Cycle.** Each engine test started after idle and a warm-up period at about 50% load, which ended when the engine coolant temperature reached 90°C. Time zero of the test (**Figure S2**) started the 60-minute transient operation cycle based on data recorded during driving a VW TDI vehicle in downtown Burlington, Vermont. Following the transient cycle were three 10-minute steady-state test phases at increasing percent engine load.

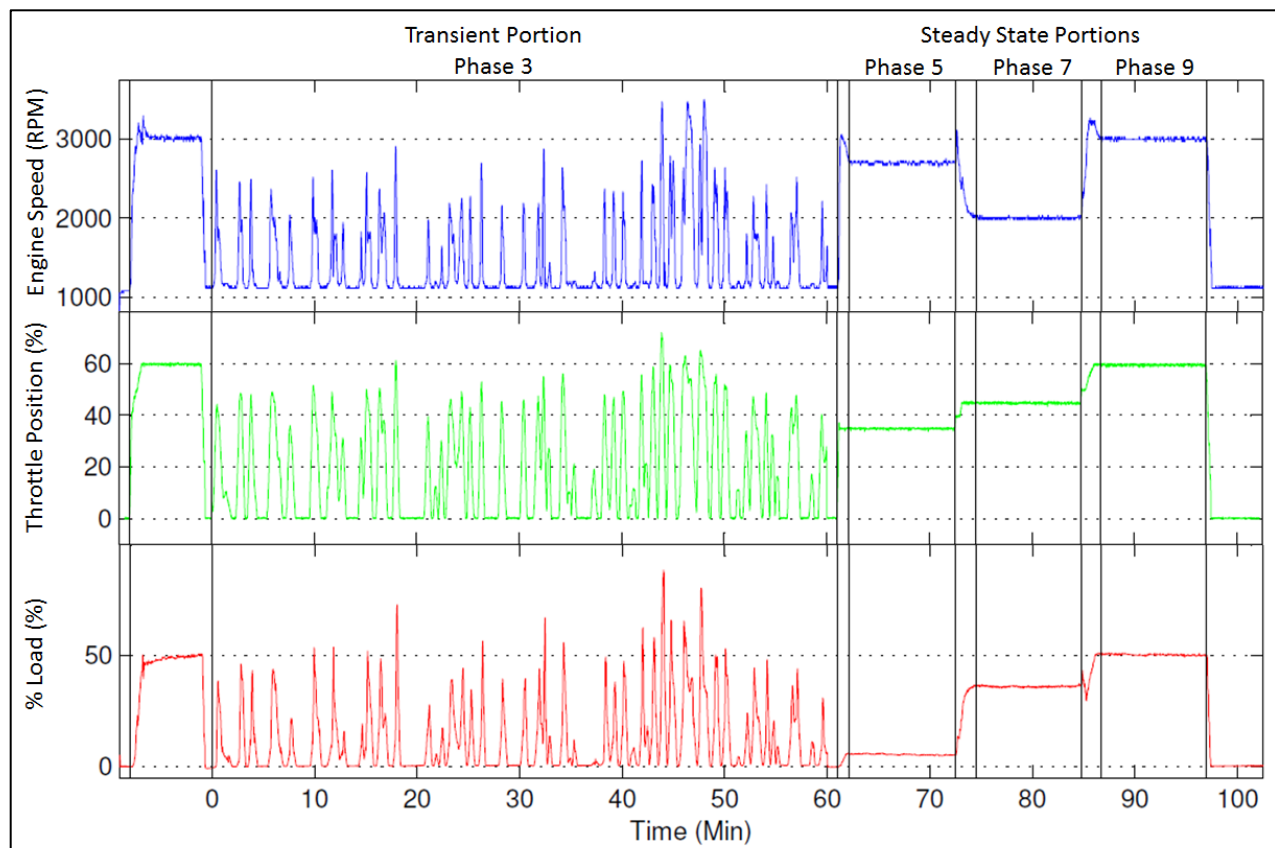

**Figure S2.** Drive cycle used during engine testing (Feralio and Holmén 2015).

## II. Detailed Results from DTT Assay.

**Table S-6. Raw Impinger Data: Mean and Standard Deviation of Drop Method PM Concentration ( $\mu\text{g}/\text{mL}_{\text{EtOH}}$ ), DTT Rate ( $\text{nmol}/\text{min}$ ) and PM-normalized DTT Activity ( $\text{nmol}/\text{min}/\text{mg}_{\text{PM}}$ )**

| Fuel Feedstock | Bxx | PM Concentration ( $\mu\text{g}/\text{mL}$ ) |       | DTT Rate ( $\text{nmol}/\text{min}$ ) |       | DTT Activity ( $\text{nmol}/\text{min}/\text{mg}_{\text{PM}}$ ) |       |
|----------------|-----|----------------------------------------------|-------|---------------------------------------|-------|-----------------------------------------------------------------|-------|
|                |     | Mean                                         | StDev | Mean                                  | StDev | Mean                                                            | StDev |
| SOY            | 0   | 18.0                                         | 3.7   | 0.37                                  | 0.05  | 20.9                                                            | 4.2   |
| SOY            | 10  | 22.3                                         | 1.7   | 0.35                                  | 0.10  | 15.3                                                            | 3.6   |
| SOY            | 20  | 21.0                                         | 2.6   | 0.22                                  | 0.07  | 10.9                                                            | 4.6   |
| SOY            | 50  | 21.4                                         | 1.0   | 0.26                                  | 0.06  | 12.4                                                            | 2.7   |
| SOY            | 100 | 20.4                                         | 4.1   | 0.27                                  | 0.06  | 13.6                                                            | 3.8   |
| WVO            | 0   | 24.9                                         | 1.7   | 0.56                                  | 0.13  | 22.6                                                            | 4.5   |
| WVO            | 10  | 21.5                                         | 1.0   | 0.39                                  | 0.12  | 17.7                                                            | 4.8   |
| WVO            | 20  | 19.3                                         | 6.0   | 0.35                                  | 0.22  | 16.9                                                            | 5.8   |
| WVO            | 50  | 26.1                                         | 7.4   | 0.24                                  | 0.17  | 8.6                                                             | 4.0   |
| WVO            | 100 | 21.2                                         | 0.6   | 0.18                                  | 0.06  | 8.5                                                             | 2.8   |

## III. Extraction of Organic Chemical Compounds

Before extraction, all filters were weighed to ensure that mass change during storage was  $\pm 5\%$  of the mass recorded prior to storage. For extraction, a  $\frac{1}{4}$ -inch punch was cut from each filter using a punch bore and placed in a  $180\ \mu\text{L}$  glass thermal desorption vial (glass TD-vial) to which  $70\ \mu\text{L}$  of DCM/Hexanes (1:1, v/v) solvent mixture was added to extract the nonpolar compounds by sonicating for 5 minutes. The punch was extracted two more times, and all three extracts were combined in a separate  $180\ \mu\text{L}$  glass TD-vial. Polar analytes were then extracted three times with  $70\ \mu\text{L}$  aliquots of MeOH and sonicating for 5 minutes each time. The three MeOH extracts were combined in a separate  $180\ \mu\text{L}$  glass TD-vial. Both the polar and nonpolar extracts were then gently blown down with  $\text{N}_2$  gas to about  $60\ \mu\text{L}$  each. The two extracts were then combined in a new  $180\ \mu\text{L}$  glass TD-vial, and the combined extract was blown down to  $100\ \mu\text{L}$ . An aliquot ( $2\ \mu\text{L}$  for Blanks, B00, B10, and B20 filter extracts;  $1\ \mu\text{L}$  for B50 filter extracts; for the B100 extracts,  $5\ \mu\text{L}$  of the extract was diluted with  $15\ \mu\text{L}$  of DCM:Hexanes:MeOH (1:1:2) and  $2\ \mu\text{L}$  of the diluted extract was used for GC/MS analysis) was then taken from the  $100\ \mu\text{L}$  final combined extract and injected in a gas chromatography/mass spectrometer (5890GC/5972MSD, Agilent Technologies, Wilmington, DE) equipped with a thermal desorption syringeless injector (Lavigne Laboratories, Storrs Mansfield, CT) for analysis of nonpolar compounds such as PAHs and n-alkanes. Given that the laboratory did not have authentic standards for the odd-numbered n-alkanes, such compounds (odd-numbered n-alkanes) were identified and confirmed using the NIST Library (NIST 2008). For the analysis of polar compounds (carbonyls and quinones), an aliquot ( $2\ \mu\text{L}$  for Blanks, B00, B10,

and B20 filter extract; 1  $\mu\text{L}$  for B50 filter extracts; 5  $\mu\text{L}$  of the extract was diluted with 15  $\mu\text{L}$  of DCM:Hexanes:MeOH (1:1:2) and 2  $\mu\text{L}$  of the diluted extract was derivatized) was then taken from the 100  $\mu\text{L}$  final extract and derivatized with excess (pentafluorobenzylhydroxylamine) PFBHA in a 180  $\mu\text{L}$  TD-vial. This was performed by adding 1  $\mu\text{L}$  of a 2.4 ppm solution of 6-fluoro-4-chromanone (6F4C) quantitation standard to the aliquot followed by 1.5  $\mu\text{L}$  of a 25 mg/mL PFBHA (in MeOH) solution.<sup>2</sup> Acetonitrile/dichloromethane (ACN/DCM) solvent mixture (9:1, v/v) was then added to the vial to target a final solution volume of 30  $\mu\text{L}$  and a PFBHA concentration of 5 mM. The sample was then derivatized at 35 °C for 24 hours. At the end of the 24 hour derivatization period, the excess PFBHA was quenched by adding 11  $\mu\text{L}$  of acetone, and the quenching reaction let to proceed for at least 1 hour at room temperature. The derivatized extract was blown down to dryness and then heated at 80 °C for 10 minutes so as to let the excess PFBHA-acetone oxime volatilize. The derivatized sample was then analyzed on the TD-GC/MS. Note that 1  $\mu\text{L}$  of a 2 ppm solution containing 6 deuterated PAH internal standards (2.65 ng of, 1,4-dichlorobenzene-D4, naphthalene-D8, acenaphthene-D10, phenanthrene-D10, chrysene-D12, and perylene-D12) in DCM was added to each sample's nonpolar extract just before TD-GC/MS analysis for quantitation of the nonpolar compounds. The internal standard eluting closest to a given target analyte was used to quantify that particular analyte. 6-Fluoro-4-chromanone, added to the polar fraction extract just before the derivatization reaction, was used as the internal standard to quantify all the derivatized POCs.<sup>2</sup>

The TD-GC/MS system operated in splitless mode using 99.999% helium carrier gas flowing at 1.6 mL/min, and a Rxi-XLB 30 m, 0.25 mm ID, and 0.25  $\mu\text{m}$  film thickness (Restek, Bellefonte, PA) column. The injector temperature was 295 °C, while the detector temperature was 290 °C. The oven program used for analysis of all extracts on the TD-GC/MS was as follows: 65 °C initial temperature held for 12 min, 10 °C/min ramp to 180 °C and held for 3 min, 2.5 °C/min ramp to 300 °C and held for 15 min. The MSD was operated with electron ionization (EI), and the EI mass spectra were acquired in scan mode ( $m/z$  50 - 650 amu).

The Rxi-XLB column could not resolve the unsaturated FAMES, and this made the analysis/quantitation of FAMES simultaneously with the PAHs and n-alkanes on the TD-GC/MS impossible. Therefore, FAMES were separately analyzed on a 6890GC/5973MSD system equipped with a polar column, SLB-IL 100, 30 m length, 0.25 mm ID, and 0.20  $\mu\text{m}$  film thickness (Sigma Aldrich, Milwaukee, WI) and a 7683 Series liquid autosampler (Agilent). A 1  $\mu\text{L}$  aliquot was drawn from the 100  $\mu\text{L}$  final extract and diluted with 50  $\mu\text{L}$  of hexanes for the Blanks, B00, B10, and B20 filter extracts. The 1  $\mu\text{L}$  aliquot from the B50 extracts was diluted with 100  $\mu\text{L}$  of hexanes, while that from the B100 extracts was diluted with 200  $\mu\text{L}$  of hexanes. An appropriate amount of a 100 ppm standard of 6F4C internal standard was then added to each extract just before GC/MS analysis to target a 6F4C concentration of 2 ppm for quantitation of all FAMES. The 6890/5973 GC/MS system also operated in splitless mode using helium carrier gas flowing at 1 mL/min. The injector and detector temperatures were 240 °C and 280 °C, respectively. The oven program used for analysis of all extracts on the 6890/5973 GC/MS system was as follows: 50 °C initial temperature held for 13.5 min, 3 °C/min ramp to 200 °C and held for 30 min. The MSD was also operated in EI mode ( $m/z$  50 - 500 amu).



Fuel samples collected from the fuel tank were analyzed for FAMES after dilution with hexanes to achieve 50-100ppm concentration of which 1  $\mu\text{L}$  was injected using the 6890/5973 autosampler. GCMS analysis was performed on the polar SLB-IL 100 column, as for the PM extracts, and similarly quantified based on authentic standards in a 10-FAME mix from Supelco.

#### IV. Determination of Organic Compound Detection Limits

Method detection limit (MDL) is defined as the amount of analyte that can be identified, measured, and reported with 99% confidence that the amount of analyte in a sample is greater than zero (Method 556, US EPA<sup>1</sup>). The method detection limits were estimated according to Method 556 (US EPA<sup>1</sup>) using the equation below:

$$\text{Method Detection Limit (MDL)} = St_{(n-1, 1-\alpha=0.99)} \quad \text{Eq (S - 1)}$$

where  $S$  = standard deviation of  $n$  runs for a sample whose concentration of the analyte is about 5 times the noise level,  $n$  = number of replicate, and  $t_{(n-1, 1-\alpha=0.99)}$  is the Student's  $t$ -value for the 99% confidence level with  $n-1$  degrees of freedom.

MDL for the PAHs were determined by analyzing a 0.125 ppm PAHs standard (number of runs,  $n = 7$ ,  $t_{n-1} = 3.143$ ) on the TD-GC/MS, while the detection limits for the  $n$ -alkanes were determined using a 0.7 ppm standard ( $n=7$ ,  $t_{n-1} = 3.143$ ). The MDLs for the FAMES were determined by analyzing a 5 ppm standard of the 10 FAMES mix seven times ( $n=7$ ,  $t_{n-1} = 3.143$ ) on the 6890/5973 GC/MS. Table S3 below shows the MDLs of the  $n$ -alkanes, PAHs, and FAMES.

**Percent Recoveries and Reproducibility.** Before extraction, each ¼-inch filter punch was spiked with 200 ng of tetracosane-d50 and 100 ng of 2-fluoro-9-fluorenone (2F9F) to assess the extraction efficiencies of the nonpolar and polar compounds in the PM, respectively. The average recovery of tetracosane-d50 was  $80.1 \pm 23.0\%$ , while that of 2F9F was  $109.6 \pm 58.4\%$ . Also, two to four punches were separately extracted from select filters in order to assess the reproducibility of the extraction and GC/MS analysis procedure. Good reproducibility (at least 75% of the extracts had %RSD values less than 20%; Average $\pm$ SD values for %RSDs of all target analyte groups were as follows:  $8.5 \pm 8.1$  for the PAHs,  $11.1 \pm 14.3$  for the  $n$ -alkanes, and  $16.0 \pm 13.4$  for the FAMES, see Kasumba<sup>3</sup> for details) was obtained for most of the exhaust PM filters where multiple one-punch extractions were performed. Further, good reproducibility was also achieved for the triplicate and duplicate filters extracted for WVO and soybean blends, respectively, as about 71% of the data had %RSD values less than 20%. Percent RSD values greater than 30% were observed for the high volatility compounds (compounds with less than 14 carbon atoms), and such variability was probably caused by losses during extract blowdown. No corrections for percent recoveries were performed, and all data, including those with high variability, were used for data analysis. Average emission rates (ng/ $\mu\text{g}$ ) of all target analytes for each biodiesel blend are in Kasumba (2015).

## V. Emission Rates of Polar Organic Compounds by Functional Group by Blend

The *eight panels* below (**Figure S3**) show the average emission rate of the sum of target analytes in each functional group class (ng/ug PM) as a function of biodiesel blend volume percent (x-axis) with different plots for WVO and SOY feedstocks. The following table summarizes the target polar organic compounds quantified in this study based on use of authentic standards.

### Target Polar Analytes By Functional Group Class

#### Aliphatic Aldehydes

Hexanal  
Heptanal  
Octanal  
Nonanal  
Decanal  
Undecanal  
Dodecanal

#### Aromatic Aldehydes

Benzaldehyde  
m-Tolualdehyde  
o-Tolualdehyde  
p-Tolualdehyde

#### Aliphatic Ketones

2-Pentanone  
3-Pentanone  
2-Nonanone  
2-Hexanone  
2-Heptanone  
2-Octanone

#### Aromatic Ketones

Acetophenone  
1-Indanone  
9-Fluorenone  
Perinaphthenone  
Benzophenone

#### Quinones

1,4-Benzoquinone  
1,4-Naphthoquinone  
Acenaphthoquinone  
Anthraquinone

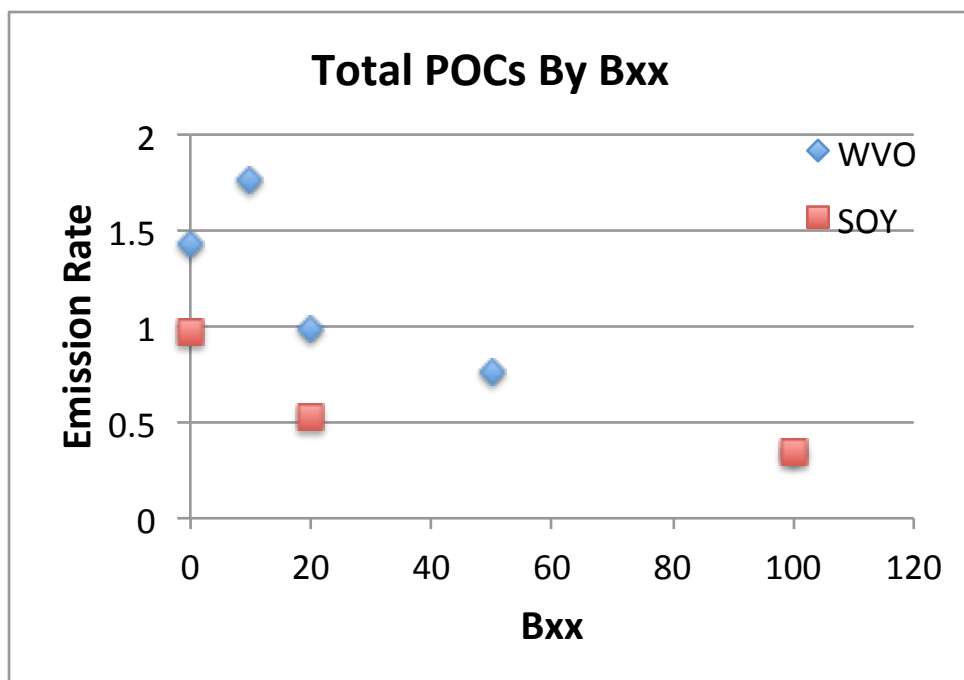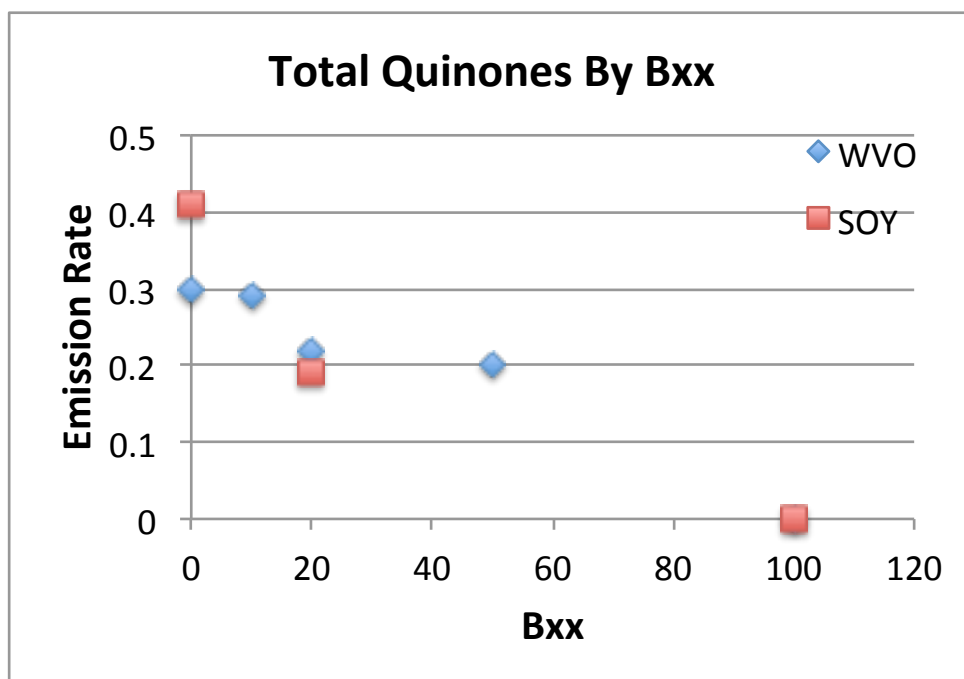

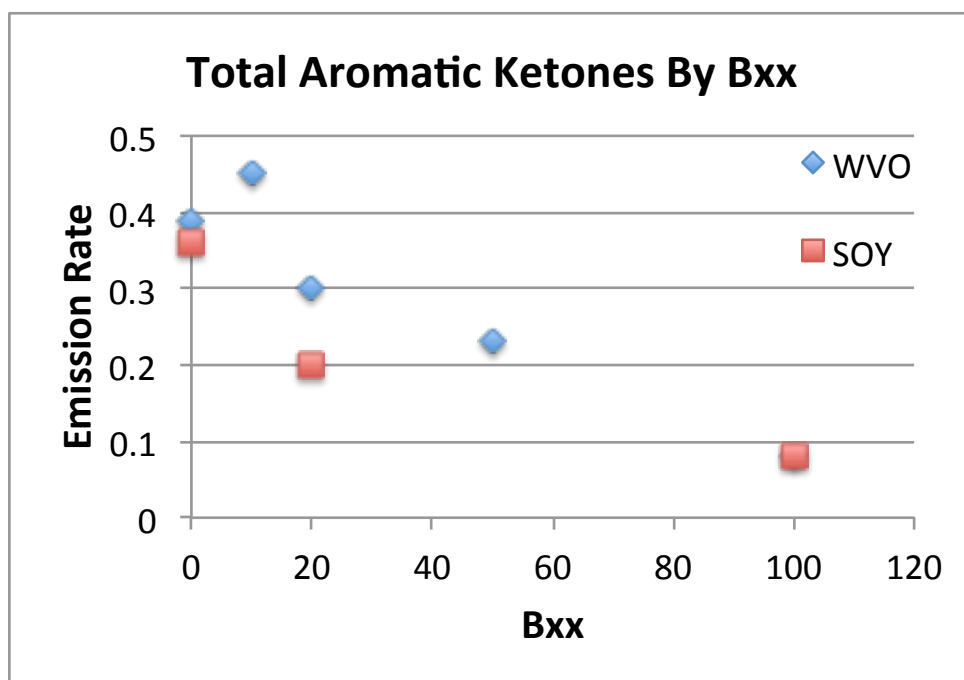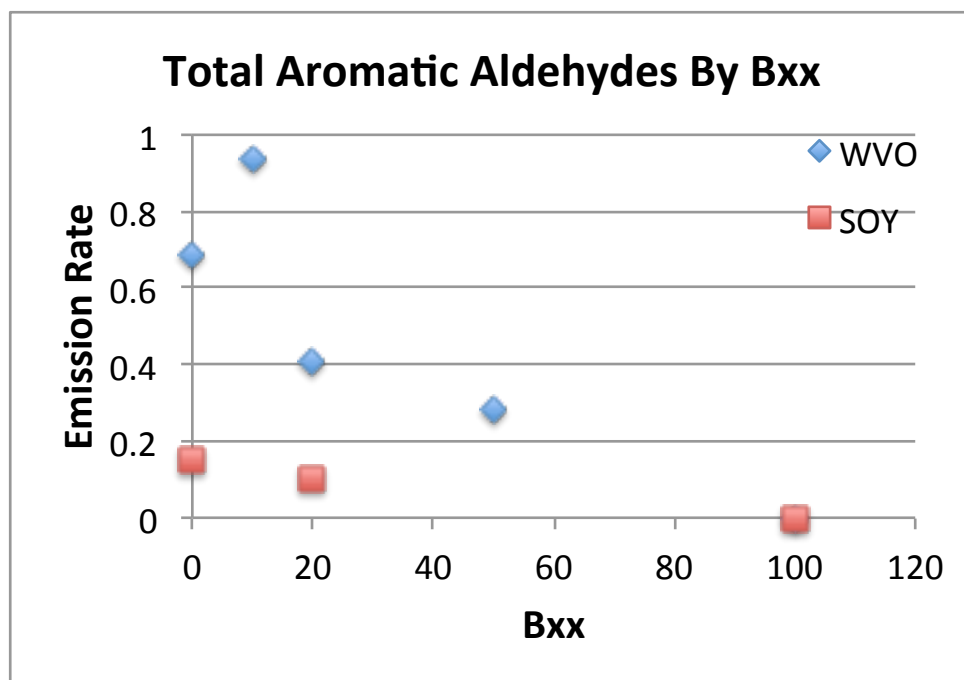

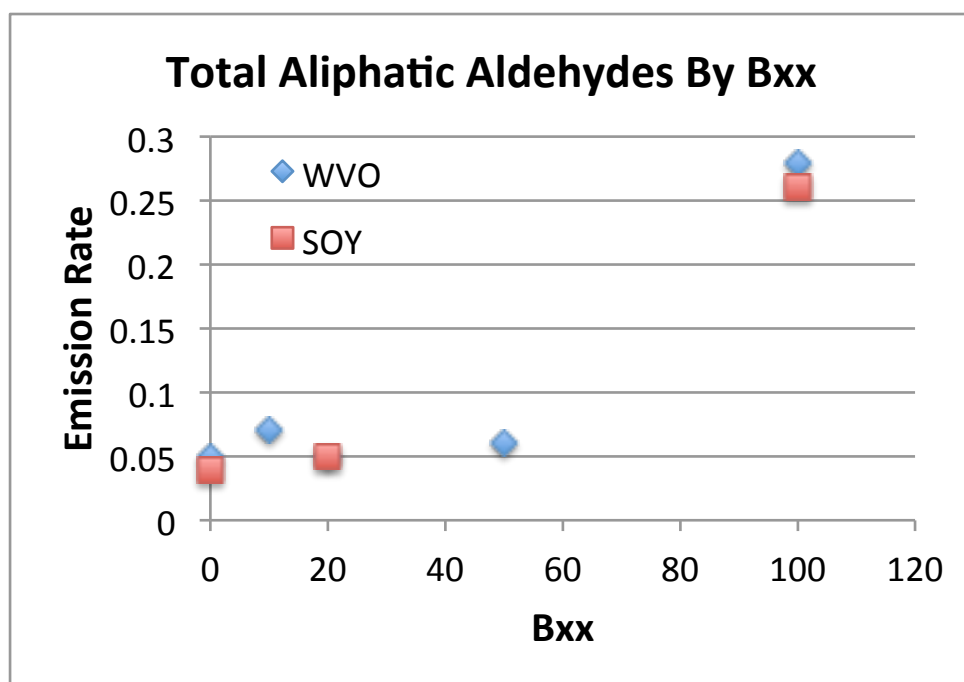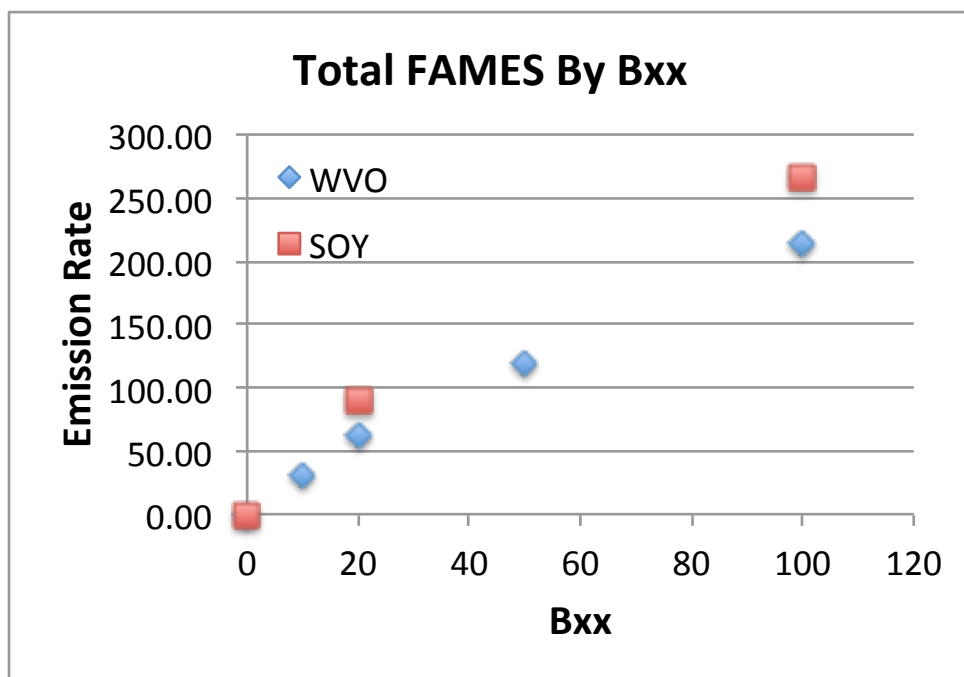

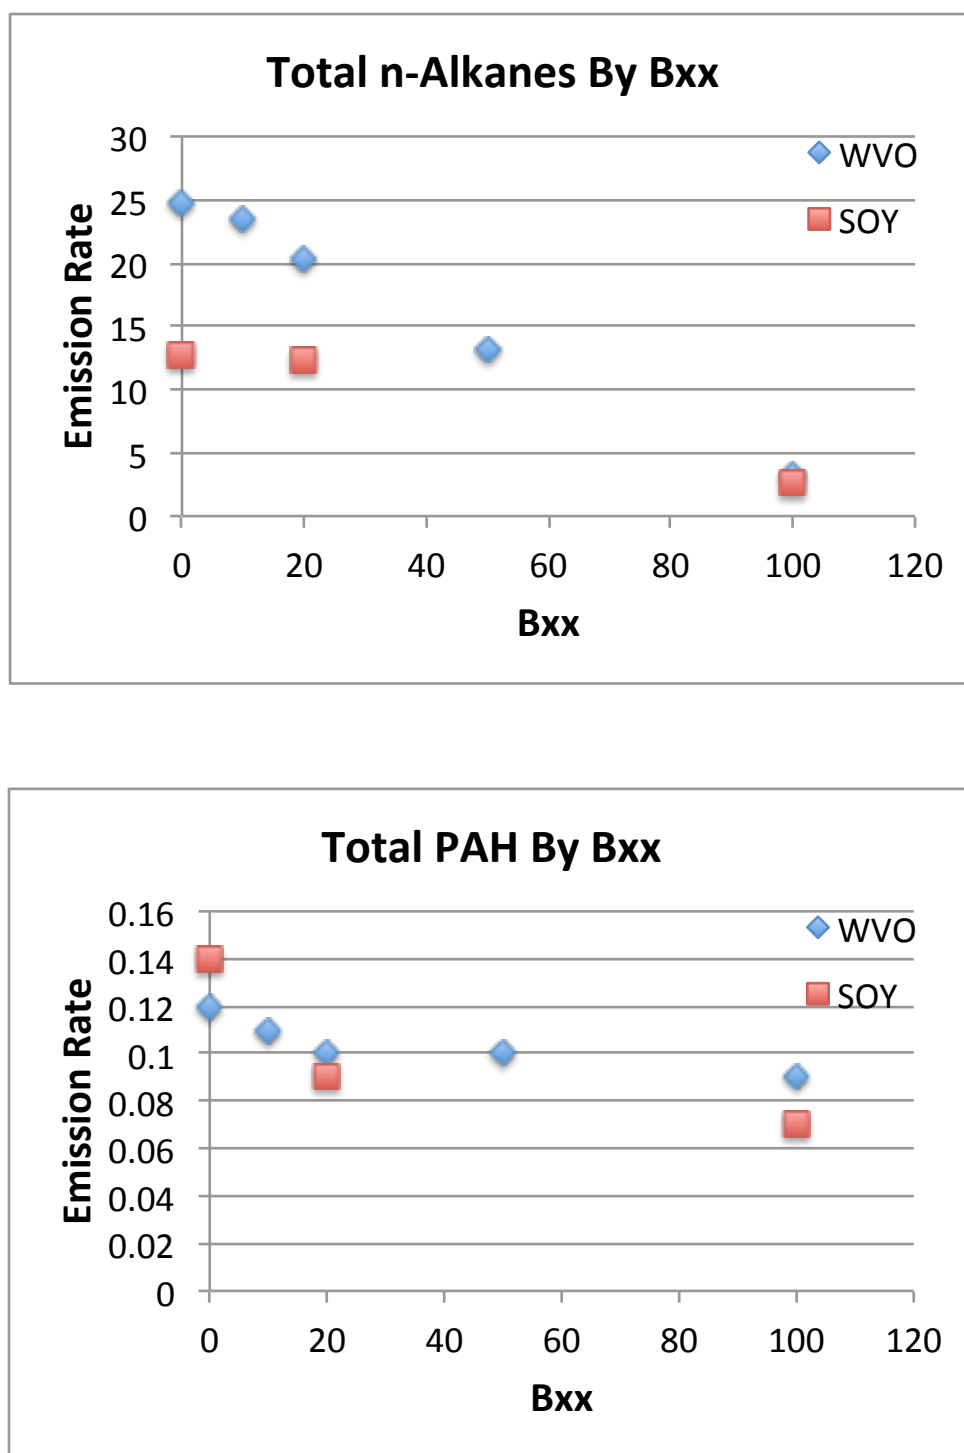

**Figure S3.** Mean organic compound class emission rate (ng/ug of PM) as a function of biodiesel blend % (x-axis) for both feedstocks.

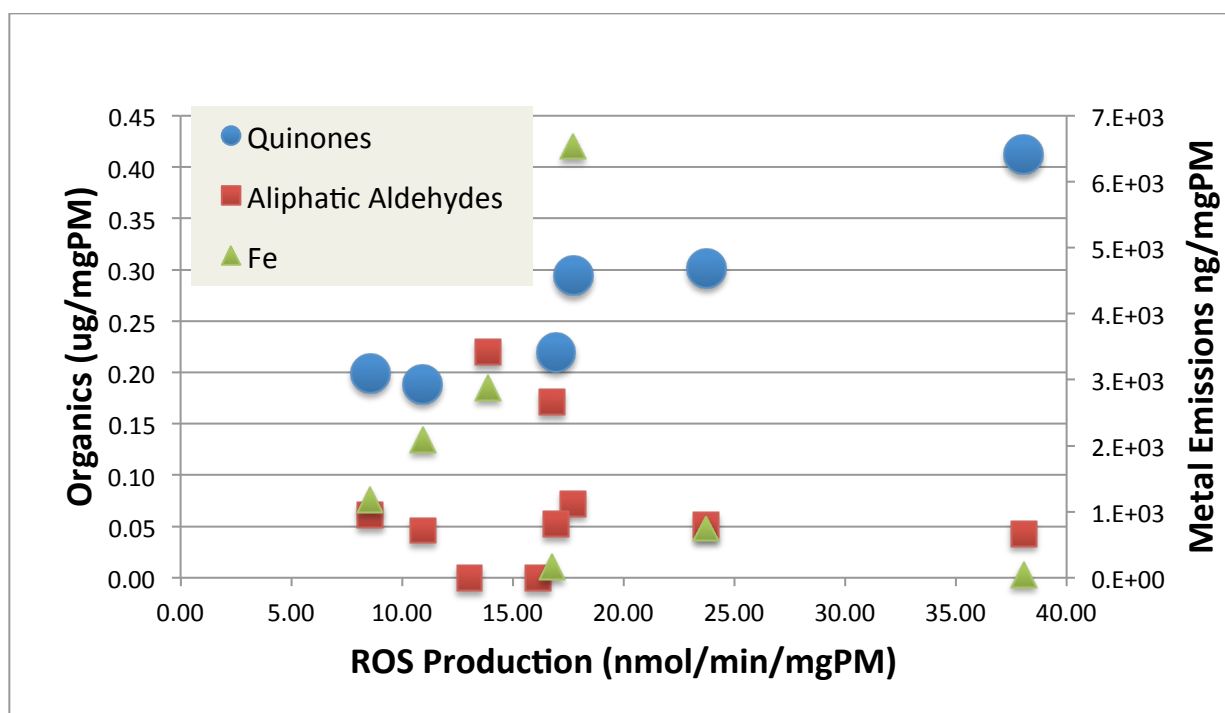

**Figure S4.** Relationship between ROS production measured by DTT Assay (x-axis) and total quinones (blue circles), total aliphatic aldehydes (red squares) and total iron (green triangles, right-hand y-axis scale) for SOY and WVO emissions tests combined.

## VI. Elemental Data from ICP-MS Analysis of Diluted PM Filters

### Blank Fiberfilm filter Raw Metals Mass.

#### BLANK FILTER - ICP/MS

*raw ng/filter*

|           |    |
|-----------|----|
| 5824.23   | Al |
| 369.71    | Fe |
| 1195.76   | Ca |
| 215353.02 | Na |
| 624.29    | Mg |
| 49497.03  | K  |
| 14102.65  | Ba |
| 1.60      | Cd |
| 1.23      | Co |
| 27.26     | Cr |
| 407.52    | Cu |
| 213.60    | Hg |
| 9.59      | Mn |
| 2.76      | Mo |
| 83.09     | Ni |
| 53.32     | Pb |
| 26.89     | Ti |
| 35.55     | V  |
| 14496.60  | Zn |

Elemental data from ICP-MS analysis of the diluted filters were highly variable due to high background of many elements in the Fiberfilm filter material. Future studies should seek alternative filter materials with low blanks to enable improved interpretation of elemental data.

**Table S-7.** Emission rates ( $\mu\text{g}/\text{mg}_{\text{PM}}$ ) for elements analyzed by ICP-MS\*.

|                               | WASTE VEGETABLE OIL |        |     |        |        | SOYBEAN |       |        |        |
|-------------------------------|---------------------|--------|-----|--------|--------|---------|-------|--------|--------|
|                               | B0                  | B10    | B20 | B50    | B100   | B0      | B20   | B100_1 | B100_2 |
| <b>Crustal Elements</b>       |                     |        |     |        |        |         |       |        |        |
| Al                            | ND                  | 22435  | ND  | 17810  | 35765  | ND      | ND    | ND     | ND     |
| Fe                            | 748                 | 6533   | ND  | 1173   | 2881   | 47      | 2094  | 162    | 118    |
| Ca                            | 660                 | 10944  | ND  | 7351   | 18318  | ND      | ND    | ND     | ND     |
| Na                            | ND                  | 440271 | ND  | 333775 | 804491 | ND      | ND    | 10230  | ND     |
| Mg                            | ND                  | 4787   | ND  | 3849   | 8842   | ND      | ND    | ND     | ND     |
| K                             | ND                  | 125459 | ND  | 96915  | 249684 | ND      | ND    | 4203   | ND     |
| <b>Anthropogenic Elements</b> |                     |        |     |        |        |         |       |        |        |
| Ba                            | ND                  | 116862 | ND  | 102344 | 279918 | ND      | ND    | ND     | ND     |
| Cd                            | 18                  | 52     | ND  | 13     | 40     | 30      | 2     | 1      | 80     |
| Co                            | 4                   | 11     | 5   | 33     | 2      | ND      | 5     | 3      | ND     |
| Cr                            | 45                  | 4597   | ND  | 118    | 2229   | ND      | 998   | 103    | 70     |
| Cu                            | 2586                | 189503 | 868 | ND     | 220038 | 1324    | 16864 | 6046   | 2586   |
| Hg                            | 825                 | 693    | 503 | 225    | ND     | ND      | ND    | ND     | ND     |
| Mn                            | 2                   | 97     | ND  | 38     | 110    | ND      | 26    | 2      | 1      |
| Mo                            | 55                  | 38     | 25  | 22     | 5      | ND      | 9     | 4      | 2      |
| Ni                            | 1169                | 52963  | ND  | 566    | 19547  | 582     | 5500  | 1826   | 514    |
| Pb                            | 483                 | 7002   | ND  | 248    | 8256   | 564     | 1742  | 222    | 1836   |
| Sr                            | ND                  | 805    | ND  | 645    | 1635   | ND      | ND    | ND     | ND     |
| Ti                            | ND                  | 190    | ND  | 28     | 38     | ND      | ND    | ND     | 2      |
| V                             | 59                  | ND     | 48  | 43     | ND     | 35      | 68    | 6      | 8      |
| Zn                            | ND                  | 235013 | ND  | 122696 | 464465 | ND      | ND    | ND     | ND     |

\* Blank-subtracted values. Replicate filters were analyzed for SOY B100 only as indicated by underscore. Color bars indicate relative magnitude of emission rates by blend (column-wise). ND = not detected after blank subtraction.

## VII. References Cited

- (1) Munch, J.; Munch, D.; Winslow, S.; Wendelken, S.; Pepich, B. Determination of carbonyl compounds in drinking water by pentafluorobenzylhydroxylamine derivatization and capillary gas chromatography with electron capture detection; Method 556; National Exposure Research Laboratory, Office of Research and Development, US Environmental Protection Agency, Cincinnati, OH, 1998.
- (2) Jakober, C. A.; Robert, M. A.; Riddle, S. G.; Destailats, H.; Charles, M. J.; Green, P. G.; Kleeman, M. J. Carbonyl Emissions from Gasoline and Diesel Motor Vehicles. *Environ. Sci. Technol.* 2008, 42 (13), 4697–4703.
- (3) Kasumba, J. Organic Chemical Characterization Of Primary And Secondary Biodiesel Exhaust Particulate Matter. Ph.D. Dissertation, Civil & Environmental Engineering, The University of Vermont, Graduate College Dissertations and Theses 2015.
